# Supplementary material for: Venous thromboembolism prophylaxis may cause more harm than benefit: an evidence-based analysis of Canadian and international guidelines
Source: Springer Nature journal article supplement (doi:10.1186/s12959-018-0180-6), 2018-08-24
Supplement: MOESM1 [file 16185952]

# CANADIAN COMMUNITY HOSPITAL

## VENOUS THROMBOEMBOLISM RISK ASSESSMENT

|              |
|--------------|
| (Patient ID) |
|--------------|

### ADMISSION RISK ASSESSMENT

- Yes  No: History of VTE or known thrombophilia
- Yes  No: Planned hip or knee arthroplasty
- Yes  No: Current hip fracture → Suggest unfractionated heparin 5000 units subcutaneous bid in anticipation of spinal anesthetic.
- Yes  No: Active malignancy
- Yes  No: Planned major abdominal/pelvic surgery (evaluate case by case)
- Yes  No: Consider other risk factors:  Morbid obesity  Bed rest > 3 days  
 First degree relative with unprovoked VTE  
 Other: \_\_\_\_\_
- Yes  No: Active bleeding or risk factors: \_\_\_\_\_

### In-Hospital Prophylaxis ordered (See Physician Orders)

- Mechanical  Pharmacologic  None

\_\_\_\_\_  
Date/Time

\_\_\_\_\_  
Practitioner's Signature

### VENOUS THROMBOEMBOLISM PROPHYLAXIS OPTIONS

- Mechanical options include graduated compression stockings or intermittent pneumatic compression devices. These are not recommended as the sole treatment for patients who are high-risk for VTE unless there is a high risk of bleeding. Mechanical options can be added to pharmacologic options for high-risk patients. Risks of mechanical VTE prophylaxis include skin breakdown or ulcer development, particularly in stroke patients.
- Pharmacologic options include enoxaparin or unfractionated heparin. Patients at high risk of bleeding should generally not receive heparin. In patients with significant renal impairment or expected to require spinal/epidural anesthesia (e.g. hip fracture), unfractionated heparin is preferred over enoxaparin (shorter duration and reversible). Suggested doses:

|                        | Normal weight               | Obese                       | Underweight                 |
|------------------------|-----------------------------|-----------------------------|-----------------------------|
| Enoxaparin             | 40 mg subcutaneous daily    | 30 mg subcutaneous bid      | 30 mg subcutaneous daily    |
| Unfractionated heparin | 5000 units subcutaneous bid | 5000 units subcutaneous tid | 3000 units subcutaneous bid |
