# Supplementary material for: Venous thromboembolism prophylaxis may cause more harm than benefit: an evidence-based analysis of Canadian and international guidelines
Source: Thromb J. 2018 Oct 10;16:25. doi: 10.1186/s12959-018-0180-6 (PMC6178253; doi:10.1186/s12959-018-0180-6)
Supplement: Supplementary file 3 — Complex liberal hospital VTE risk-scoring tool: treats most hospitalized patients. (PDF 130 kb) [file 12959_2018_180_MOESM3_ESM.pdf]

## Thromboprophylaxis for Venous Thromboembolism (VTE) (Page 1 of 1)

DATE \_\_\_\_/\_\_\_\_/\_\_\_\_ TIME \_\_\_\_  
DD MM YYYY

WEIGHT: \_\_\_\_ KG HEIGHT \_\_\_\_ CM

☐ ALLERGY CAUTION sheet reviewed

### Patient Care

☐ Postpartum VTE Risk Assessment on Postpartum Orders Completed

▸ **Delivery Date:** \_\_\_\_ **Time:** \_\_\_\_

### Mechanical Prophylaxis:

#### INTERMEDIATE and HIGH RISK:

☐ Sequential Compression Devices (SCD)

▸ **Mobilize early and avoid dehydration**

### Medications

#### Pharmacologic Prophylaxis:

☐ dalteparin 5000 unit subcutaneously once daily

#### ▸ Individualized dose:

☐ dalteparin 7500 unit subcutaneously (use current BMI equal to or greater than 40) once daily

☐ dalteparin 2500 unit subcutaneously (for eGFR less than 30mL/min or weight equal to or less than 40 kg) once daily

▸ **DO NOT administer LMWH within 2 hours of epidural catheter removal**

▸ **See contraindications to low molecular weight heparin (LMWH) on reverse side**

### Intermediate Risk:

#### Frequency

☐ Standard 6 hours post-delivery. Date: \_\_\_\_ Time: \_\_\_\_

**\*OR\***

☐ Delay initial dose until Date: \_\_\_\_ Time: \_\_\_\_

▸ **THEN give dose once, daily (minimum of 24 hours after initial dose)**

☐ 1000 hours **\*OR\*** ☐ 2200 hours

▸ **Start Date:** \_\_\_\_

▸ **Review for need for further prophylaxis after 72 hours if still in hospital**

### High Risk:

▸ **Individual orders are based on antepartum consultation letter for pharmacologic prophylaxis recommendations (write order on blank prescriber's orders)**

### At Discharge

☐ For Intermediate Risk: Discontinue prophylaxis at discharge

☐ For High Risk: Continue pharmacologic treatment for 6 weeks (prescription)

Signature: \_\_\_\_\_ Print Name: \_\_\_\_\_

College ID: \_\_\_\_\_ Pager: \_\_\_\_\_

## BC Women's Prescriber's Orders Postpartum - Cesarean Births

Allergy \_\_\_\_\_

| DATE dd/MON/yyyy                                                                                                                                                            |                 | TIME hh:mm                                                                                                                                                                                                                                                                                                                                                                                                                                                                                                                                                                                                                                                                                                                                                                                                                                                                                                                                                                                                                                                                                                                                                                                                                                                                                                                                                                                                                                                                                                                                                                                       |                                  | WEIGHT<br>kilograms (kg)     |  | HEIGHT<br>centimetres |  |                    |      |       |           |            |                                                 |  |  |  |  |                                               |    |                     |              |  |                                                                                                                                                                             |  |  |  |  |                                                   |            |                            |                  |  |                                         |        |                |                  |  |                                                      |            |          |              |  |                                                                                          |  |  |  |                              |                                                            |                 |      |                                  |  |                                                                        |                |      |                    |  |  |  |
|-----------------------------------------------------------------------------------------------------------------------------------------------------------------------------|-----------------|--------------------------------------------------------------------------------------------------------------------------------------------------------------------------------------------------------------------------------------------------------------------------------------------------------------------------------------------------------------------------------------------------------------------------------------------------------------------------------------------------------------------------------------------------------------------------------------------------------------------------------------------------------------------------------------------------------------------------------------------------------------------------------------------------------------------------------------------------------------------------------------------------------------------------------------------------------------------------------------------------------------------------------------------------------------------------------------------------------------------------------------------------------------------------------------------------------------------------------------------------------------------------------------------------------------------------------------------------------------------------------------------------------------------------------------------------------------------------------------------------------------------------------------------------------------------------------------------------|----------------------------------|------------------------------|--|-----------------------|--|--------------------|------|-------|-----------|------------|-------------------------------------------------|--|--|--|--|-----------------------------------------------|----|---------------------|--------------|--|-----------------------------------------------------------------------------------------------------------------------------------------------------------------------------|--|--|--|--|---------------------------------------------------|------------|----------------------------|------------------|--|-----------------------------------------|--------|----------------|------------------|--|------------------------------------------------------|------------|----------|--------------|--|------------------------------------------------------------------------------------------|--|--|--|------------------------------|------------------------------------------------------------|-----------------|------|----------------------------------|--|------------------------------------------------------------------------|----------------|------|--------------------|--|--|--|
| Pharmacy<br>Use Only                                                                                                                                                        |                 | <b>Checkmark All Tick Boxes That Apply.</b>                                                                                                                                                                                                                                                                                                                                                                                                                                                                                                                                                                                                                                                                                                                                                                                                                                                                                                                                                                                                                                                                                                                                                                                                                                                                                                                                                                                                                                                                                                                                                      |                                  |                              |  |                       |  | Noted By<br>RN/ UC |      |       |           |            |                                                 |  |  |  |  |                                               |    |                     |              |  |                                                                                                                                                                             |  |  |  |  |                                                   |            |                            |                  |  |                                         |        |                |                  |  |                                                      |            |          |              |  |                                                                                          |  |  |  |                              |                                                            |                 |      |                                  |  |                                                                        |                |      |                    |  |  |  |
|                                                                                                                                                                             |                 | <b>1. Postpartum Admission</b> <ul style="list-style-type: none"> <li>Activity as tolerated, and sips to diet as tolerated</li> <li>Remove foley after 12 hours post – operative</li> <li>Remove staples post-operative day <input type="checkbox"/> 2 <input type="checkbox"/> 3 Other _____</li> <li>Intravenous (IV) D5W normal saline, infuse at 80 millilitres (mL)/ hour</li> </ul>                                                                                                                                                                                                                                                                                                                                                                                                                                                                                                                                                                                                                                                                                                                                                                                                                                                                                                                                                                                                                                                                                                                                                                                                        |                                  |                              |  |                       |  |                    |      |       |           |            |                                                 |  |  |  |  |                                               |    |                     |              |  |                                                                                                                                                                             |  |  |  |  |                                                   |            |                            |                  |  |                                         |        |                |                  |  |                                                      |            |          |              |  |                                                                                          |  |  |  |                              |                                                            |                 |      |                                  |  |                                                                        |                |      |                    |  |  |  |
|                                                                                                                                                                             |                 | <table border="1"> <thead> <tr> <th>Medication</th> <th>Dose</th> <th>Route</th> <th>Frequency</th> <th>Indication</th> </tr> </thead> <tbody> <tr> <td colspan="5"><b>2. Administered by Registered Nurse (RN)</b></td> </tr> <tr> <td><input type="checkbox"/> Oxytocin _____ units</td> <td>IV</td> <td>once in first litre</td> <td colspan="2">for bleeding</td> </tr> <tr> <td colspan="5"> <ul style="list-style-type: none"> <li>Discontinue IV if bowel sounds are present and drinking well</li> <li>If IV needed for medications, change to saline lock</li> </ul> </td> </tr> <tr> <td><input type="checkbox"/> Glycerin suppository one</td> <td>per rectum</td> <td>once daily as needed (prn)</td> <td colspan="2">constipation/gas</td> </tr> <tr> <td><input type="checkbox"/> Magnolax 30 mL</td> <td>orally</td> <td>once daily prn</td> <td colspan="2">constipation/gas</td> </tr> <tr> <td><input type="checkbox"/> Phosphate enema (Fleet) one</td> <td>per rectum</td> <td>once prn</td> <td colspan="2">constipation</td> </tr> <tr> <td colspan="4">Rh negative (-) maternal blood group:<br/>(Check consent for Rh immune globulin on chart)</td> <td>If newborn is Rh positive or</td> </tr> <tr> <td><input type="checkbox"/> Rh immune globulin 120 micrograms</td> <td>intramuscularly</td> <td>once</td> <td colspan="2"><input type="checkbox"/> unknown</td> </tr> <tr> <td><input type="checkbox"/> MMR Vaccine 0.5 mL<br/>(Measles-Mumps-Rubella)</td> <td>subcutaneously</td> <td>once</td> <td colspan="2">Rubella non-immune</td> </tr> </tbody> </table> |                                  |                              |  |                       |  | Medication         | Dose | Route | Frequency | Indication | <b>2. Administered by Registered Nurse (RN)</b> |  |  |  |  | <input type="checkbox"/> Oxytocin _____ units | IV | once in first litre | for bleeding |  | <ul style="list-style-type: none"> <li>Discontinue IV if bowel sounds are present and drinking well</li> <li>If IV needed for medications, change to saline lock</li> </ul> |  |  |  |  | <input type="checkbox"/> Glycerin suppository one | per rectum | once daily as needed (prn) | constipation/gas |  | <input type="checkbox"/> Magnolax 30 mL | orally | once daily prn | constipation/gas |  | <input type="checkbox"/> Phosphate enema (Fleet) one | per rectum | once prn | constipation |  | Rh negative (-) maternal blood group:<br>(Check consent for Rh immune globulin on chart) |  |  |  | If newborn is Rh positive or | <input type="checkbox"/> Rh immune globulin 120 micrograms | intramuscularly | once | <input type="checkbox"/> unknown |  | <input type="checkbox"/> MMR Vaccine 0.5 mL<br>(Measles-Mumps-Rubella) | subcutaneously | once | Rubella non-immune |  |  |  |
| Medication                                                                                                                                                                  | Dose            | Route                                                                                                                                                                                                                                                                                                                                                                                                                                                                                                                                                                                                                                                                                                                                                                                                                                                                                                                                                                                                                                                                                                                                                                                                                                                                                                                                                                                                                                                                                                                                                                                            | Frequency                        | Indication                   |  |                       |  |                    |      |       |           |            |                                                 |  |  |  |  |                                               |    |                     |              |  |                                                                                                                                                                             |  |  |  |  |                                                   |            |                            |                  |  |                                         |        |                |                  |  |                                                      |            |          |              |  |                                                                                          |  |  |  |                              |                                                            |                 |      |                                  |  |                                                                        |                |      |                    |  |  |  |
| <b>2. Administered by Registered Nurse (RN)</b>                                                                                                                             |                 |                                                                                                                                                                                                                                                                                                                                                                                                                                                                                                                                                                                                                                                                                                                                                                                                                                                                                                                                                                                                                                                                                                                                                                                                                                                                                                                                                                                                                                                                                                                                                                                                  |                                  |                              |  |                       |  |                    |      |       |           |            |                                                 |  |  |  |  |                                               |    |                     |              |  |                                                                                                                                                                             |  |  |  |  |                                                   |            |                            |                  |  |                                         |        |                |                  |  |                                                      |            |          |              |  |                                                                                          |  |  |  |                              |                                                            |                 |      |                                  |  |                                                                        |                |      |                    |  |  |  |
| <input type="checkbox"/> Oxytocin _____ units                                                                                                                               | IV              | once in first litre                                                                                                                                                                                                                                                                                                                                                                                                                                                                                                                                                                                                                                                                                                                                                                                                                                                                                                                                                                                                                                                                                                                                                                                                                                                                                                                                                                                                                                                                                                                                                                              | for bleeding                     |                              |  |                       |  |                    |      |       |           |            |                                                 |  |  |  |  |                                               |    |                     |              |  |                                                                                                                                                                             |  |  |  |  |                                                   |            |                            |                  |  |                                         |        |                |                  |  |                                                      |            |          |              |  |                                                                                          |  |  |  |                              |                                                            |                 |      |                                  |  |                                                                        |                |      |                    |  |  |  |
| <ul style="list-style-type: none"> <li>Discontinue IV if bowel sounds are present and drinking well</li> <li>If IV needed for medications, change to saline lock</li> </ul> |                 |                                                                                                                                                                                                                                                                                                                                                                                                                                                                                                                                                                                                                                                                                                                                                                                                                                                                                                                                                                                                                                                                                                                                                                                                                                                                                                                                                                                                                                                                                                                                                                                                  |                                  |                              |  |                       |  |                    |      |       |           |            |                                                 |  |  |  |  |                                               |    |                     |              |  |                                                                                                                                                                             |  |  |  |  |                                                   |            |                            |                  |  |                                         |        |                |                  |  |                                                      |            |          |              |  |                                                                                          |  |  |  |                              |                                                            |                 |      |                                  |  |                                                                        |                |      |                    |  |  |  |
| <input type="checkbox"/> Glycerin suppository one                                                                                                                           | per rectum      | once daily as needed (prn)                                                                                                                                                                                                                                                                                                                                                                                                                                                                                                                                                                                                                                                                                                                                                                                                                                                                                                                                                                                                                                                                                                                                                                                                                                                                                                                                                                                                                                                                                                                                                                       | constipation/gas                 |                              |  |                       |  |                    |      |       |           |            |                                                 |  |  |  |  |                                               |    |                     |              |  |                                                                                                                                                                             |  |  |  |  |                                                   |            |                            |                  |  |                                         |        |                |                  |  |                                                      |            |          |              |  |                                                                                          |  |  |  |                              |                                                            |                 |      |                                  |  |                                                                        |                |      |                    |  |  |  |
| <input type="checkbox"/> Magnolax 30 mL                                                                                                                                     | orally          | once daily prn                                                                                                                                                                                                                                                                                                                                                                                                                                                                                                                                                                                                                                                                                                                                                                                                                                                                                                                                                                                                                                                                                                                                                                                                                                                                                                                                                                                                                                                                                                                                                                                   | constipation/gas                 |                              |  |                       |  |                    |      |       |           |            |                                                 |  |  |  |  |                                               |    |                     |              |  |                                                                                                                                                                             |  |  |  |  |                                                   |            |                            |                  |  |                                         |        |                |                  |  |                                                      |            |          |              |  |                                                                                          |  |  |  |                              |                                                            |                 |      |                                  |  |                                                                        |                |      |                    |  |  |  |
| <input type="checkbox"/> Phosphate enema (Fleet) one                                                                                                                        | per rectum      | once prn                                                                                                                                                                                                                                                                                                                                                                                                                                                                                                                                                                                                                                                                                                                                                                                                                                                                                                                                                                                                                                                                                                                                                                                                                                                                                                                                                                                                                                                                                                                                                                                         | constipation                     |                              |  |                       |  |                    |      |       |           |            |                                                 |  |  |  |  |                                               |    |                     |              |  |                                                                                                                                                                             |  |  |  |  |                                                   |            |                            |                  |  |                                         |        |                |                  |  |                                                      |            |          |              |  |                                                                                          |  |  |  |                              |                                                            |                 |      |                                  |  |                                                                        |                |      |                    |  |  |  |
| Rh negative (-) maternal blood group:<br>(Check consent for Rh immune globulin on chart)                                                                                    |                 |                                                                                                                                                                                                                                                                                                                                                                                                                                                                                                                                                                                                                                                                                                                                                                                                                                                                                                                                                                                                                                                                                                                                                                                                                                                                                                                                                                                                                                                                                                                                                                                                  |                                  | If newborn is Rh positive or |  |                       |  |                    |      |       |           |            |                                                 |  |  |  |  |                                               |    |                     |              |  |                                                                                                                                                                             |  |  |  |  |                                                   |            |                            |                  |  |                                         |        |                |                  |  |                                                      |            |          |              |  |                                                                                          |  |  |  |                              |                                                            |                 |      |                                  |  |                                                                        |                |      |                    |  |  |  |
| <input type="checkbox"/> Rh immune globulin 120 micrograms                                                                                                                  | intramuscularly | once                                                                                                                                                                                                                                                                                                                                                                                                                                                                                                                                                                                                                                                                                                                                                                                                                                                                                                                                                                                                                                                                                                                                                                                                                                                                                                                                                                                                                                                                                                                                                                                             | <input type="checkbox"/> unknown |                              |  |                       |  |                    |      |       |           |            |                                                 |  |  |  |  |                                               |    |                     |              |  |                                                                                                                                                                             |  |  |  |  |                                                   |            |                            |                  |  |                                         |        |                |                  |  |                                                      |            |          |              |  |                                                                                          |  |  |  |                              |                                                            |                 |      |                                  |  |                                                                        |                |      |                    |  |  |  |
| <input type="checkbox"/> MMR Vaccine 0.5 mL<br>(Measles-Mumps-Rubella)                                                                                                      | subcutaneously  | once                                                                                                                                                                                                                                                                                                                                                                                                                                                                                                                                                                                                                                                                                                                                                                                                                                                                                                                                                                                                                                                                                                                                                                                                                                                                                                                                                                                                                                                                                                                                                                                             | Rubella non-immune               |                              |  |                       |  |                    |      |       |           |            |                                                 |  |  |  |  |                                               |    |                     |              |  |                                                                                                                                                                             |  |  |  |  |                                                   |            |                            |                  |  |                                         |        |                |                  |  |                                                      |            |          |              |  |                                                                                          |  |  |  |                              |                                                            |                 |      |                                  |  |                                                                        |                |      |                    |  |  |  |
|                                                                                                                                                                             |                 | <b>3. Woman's Self - Administered Medications at RNs Discretion or Administered by RN.</b><br>Or <input type="checkbox"/> Do not self - administer medications.                                                                                                                                                                                                                                                                                                                                                                                                                                                                                                                                                                                                                                                                                                                                                                                                                                                                                                                                                                                                                                                                                                                                                                                                                                                                                                                                                                                                                                  |                                  |                              |  |                       |  |                    |      |       |           |            |                                                 |  |  |  |  |                                               |    |                     |              |  |                                                                                                                                                                             |  |  |  |  |                                                   |            |                            |                  |  |                                         |        |                |                  |  |                                                      |            |          |              |  |                                                                                          |  |  |  |                              |                                                            |                 |      |                                  |  |                                                                        |                |      |                    |  |  |  |
|                                                                                                                                                                             |                 | <input type="checkbox"/> Docusate 100 milligrams orally twice daily prn stool softener                                                                                                                                                                                                                                                                                                                                                                                                                                                                                                                                                                                                                                                                                                                                                                                                                                                                                                                                                                                                                                                                                                                                                                                                                                                                                                                                                                                                                                                                                                           |                                  |                              |  |                       |  |                    |      |       |           |            |                                                 |  |  |  |  |                                               |    |                     |              |  |                                                                                                                                                                             |  |  |  |  |                                                   |            |                            |                  |  |                                         |        |                |                  |  |                                                      |            |          |              |  |                                                                                          |  |  |  |                              |                                                            |                 |      |                                  |  |                                                                        |                |      |                    |  |  |  |
|                                                                                                                                                                             |                 | <input type="checkbox"/> Anusol HC tube or substitute one apply rectally twice daily & after bowel movement prn hemorrhoids                                                                                                                                                                                                                                                                                                                                                                                                                                                                                                                                                                                                                                                                                                                                                                                                                                                                                                                                                                                                                                                                                                                                                                                                                                                                                                                                                                                                                                                                      |                                  |                              |  |                       |  |                    |      |       |           |            |                                                 |  |  |  |  |                                               |    |                     |              |  |                                                                                                                                                                             |  |  |  |  |                                                   |            |                            |                  |  |                                         |        |                |                  |  |                                                      |            |          |              |  |                                                                                          |  |  |  |                              |                                                            |                 |      |                                  |  |                                                                        |                |      |                    |  |  |  |
|                                                                                                                                                                             |                 | <b>Additional Medications to Start 48 hours Post - operatively</b>                                                                                                                                                                                                                                                                                                                                                                                                                                                                                                                                                                                                                                                                                                                                                                                                                                                                                                                                                                                                                                                                                                                                                                                                                                                                                                                                                                                                                                                                                                                               |                                  |                              |  |                       |  |                    |      |       |           |            |                                                 |  |  |  |  |                                               |    |                     |              |  |                                                                                                                                                                             |  |  |  |  |                                                   |            |                            |                  |  |                                         |        |                |                  |  |                                                      |            |          |              |  |                                                                                          |  |  |  |                              |                                                            |                 |      |                                  |  |                                                                        |                |      |                    |  |  |  |
|                                                                                                                                                                             |                 | <b>4. Medication administered by RN only.</b>                                                                                                                                                                                                                                                                                                                                                                                                                                                                                                                                                                                                                                                                                                                                                                                                                                                                                                                                                                                                                                                                                                                                                                                                                                                                                                                                                                                                                                                                                                                                                    |                                  |                              |  |                       |  |                    |      |       |           |            |                                                 |  |  |  |  |                                               |    |                     |              |  |                                                                                                                                                                             |  |  |  |  |                                                   |            |                            |                  |  |                                         |        |                |                  |  |                                                      |            |          |              |  |                                                                                          |  |  |  |                              |                                                            |                 |      |                                  |  |                                                                        |                |      |                    |  |  |  |
|                                                                                                                                                                             |                 | <input type="checkbox"/> Hydromorphone 2 - 4 milligrams orally every 4 hours prn break-through pain                                                                                                                                                                                                                                                                                                                                                                                                                                                                                                                                                                                                                                                                                                                                                                                                                                                                                                                                                                                                                                                                                                                                                                                                                                                                                                                                                                                                                                                                                              |                                  |                              |  |                       |  |                    |      |       |           |            |                                                 |  |  |  |  |                                               |    |                     |              |  |                                                                                                                                                                             |  |  |  |  |                                                   |            |                            |                  |  |                                         |        |                |                  |  |                                                      |            |          |              |  |                                                                                          |  |  |  |                              |                                                            |                 |      |                                  |  |                                                                        |                |      |                    |  |  |  |
|                                                                                                                                                                             |                 | <b>5. Woman's Self - Administered Medications at RNs Discretion or Administered by RN.</b><br>Or <input type="checkbox"/> Do not self - administer medications.                                                                                                                                                                                                                                                                                                                                                                                                                                                                                                                                                                                                                                                                                                                                                                                                                                                                                                                                                                                                                                                                                                                                                                                                                                                                                                                                                                                                                                  |                                  |                              |  |                       |  |                    |      |       |           |            |                                                 |  |  |  |  |                                               |    |                     |              |  |                                                                                                                                                                             |  |  |  |  |                                                   |            |                            |                  |  |                                         |        |                |                  |  |                                                      |            |          |              |  |                                                                                          |  |  |  |                              |                                                            |                 |      |                                  |  |                                                                        |                |      |                    |  |  |  |
|                                                                                                                                                                             |                 | <input type="checkbox"/> Acetaminophen 325 - 650 milligrams orally every 4 - 6 hours prn maximum 4 grams in 24 hours pain                                                                                                                                                                                                                                                                                                                                                                                                                                                                                                                                                                                                                                                                                                                                                                                                                                                                                                                                                                                                                                                                                                                                                                                                                                                                                                                                                                                                                                                                        |                                  |                              |  |                       |  |                    |      |       |           |            |                                                 |  |  |  |  |                                               |    |                     |              |  |                                                                                                                                                                             |  |  |  |  |                                                   |            |                            |                  |  |                                         |        |                |                  |  |                                                      |            |          |              |  |                                                                                          |  |  |  |                              |                                                            |                 |      |                                  |  |                                                                        |                |      |                    |  |  |  |
|                                                                                                                                                                             |                 | <input type="checkbox"/> Ibuprofen 400 milligrams orally every 4 - 6 hours prn pain                                                                                                                                                                                                                                                                                                                                                                                                                                                                                                                                                                                                                                                                                                                                                                                                                                                                                                                                                                                                                                                                                                                                                                                                                                                                                                                                                                                                                                                                                                              |                                  |                              |  |                       |  |                    |      |       |           |            |                                                 |  |  |  |  |                                               |    |                     |              |  |                                                                                                                                                                             |  |  |  |  |                                                   |            |                            |                  |  |                                         |        |                |                  |  |                                                      |            |          |              |  |                                                                                          |  |  |  |                              |                                                            |                 |      |                                  |  |                                                                        |                |      |                    |  |  |  |
|                                                                                                                                                                             |                 | <b>6. Venous Thromboembolism (VTE) Risk Assessment (COMPLETE reverse side)</b><br><input type="checkbox"/> Low Risk <input type="checkbox"/> Intermediate/ High Risk (Obtain & complete Postpartum VTE Orders BCW210)                                                                                                                                                                                                                                                                                                                                                                                                                                                                                                                                                                                                                                                                                                                                                                                                                                                                                                                                                                                                                                                                                                                                                                                                                                                                                                                                                                            |                                  |                              |  |                       |  |                    |      |       |           |            |                                                 |  |  |  |  |                                               |    |                     |              |  |                                                                                                                                                                             |  |  |  |  |                                                   |            |                            |                  |  |                                         |        |                |                  |  |                                                      |            |          |              |  |                                                                                          |  |  |  |                              |                                                            |                 |      |                                  |  |                                                                        |                |      |                    |  |  |  |
|                                                                                                                                                                             |                 | <b>7. Physician responsible for care postoperative day:</b><br>#1 _____ #3 _____<br>#2 _____ #4 _____                                                                                                                                                                                                                                                                                                                                                                                                                                                                                                                                                                                                                                                                                                                                                                                                                                                                                                                                                                                                                                                                                                                                                                                                                                                                                                                                                                                                                                                                                            |                                  |                              |  |                       |  |                    |      |       |           |            |                                                 |  |  |  |  |                                               |    |                     |              |  |                                                                                                                                                                             |  |  |  |  |                                                   |            |                            |                  |  |                                         |        |                |                  |  |                                                      |            |          |              |  |                                                                                          |  |  |  |                              |                                                            |                 |      |                                  |  |                                                                        |                |      |                    |  |  |  |
| Physician's Signature _____                                                                                                                                                 |                 | CPSID# _____                                                                                                                                                                                                                                                                                                                                                                                                                                                                                                                                                                                                                                                                                                                                                                                                                                                                                                                                                                                                                                                                                                                                                                                                                                                                                                                                                                                                                                                                                                                                                                                     |                                  |                              |  |                       |  |                    |      |       |           |            |                                                 |  |  |  |  |                                               |    |                     |              |  |                                                                                                                                                                             |  |  |  |  |                                                   |            |                            |                  |  |                                         |        |                |                  |  |                                                      |            |          |              |  |                                                                                          |  |  |  |                              |                                                            |                 |      |                                  |  |                                                                        |                |      |                    |  |  |  |
| Print name _____                                                                                                                                                            |                 | Pager Number _____                                                                                                                                                                                                                                                                                                                                                                                                                                                                                                                                                                                                                                                                                                                                                                                                                                                                                                                                                                                                                                                                                                                                                                                                                                                                                                                                                                                                                                                                                                                                                                               |                                  |                              |  |                       |  |                    |      |       |           |            |                                                 |  |  |  |  |                                               |    |                     |              |  |                                                                                                                                                                             |  |  |  |  |                                                   |            |                            |                  |  |                                         |        |                |                  |  |                                                      |            |          |              |  |                                                                                          |  |  |  |                              |                                                            |                 |      |                                  |  |                                                                        |                |      |                    |  |  |  |

☐ **Photocopy** and send to Pharmacy

## POSTPARTUM RISK ASSESSMENT FOR VENOUS THROMBOEMBOLISM (VTE) PROPHYLAXIS

**Following delivery the prescriber completes the Postpartum Risk Assessment.**

(✓ Checkmark all tick boxes that apply.)

☐ **No Risk Factors**

**Pre-existing**

- ☐ Age greater than or equal to 35 years
- ☐ Gross varicose veins
- ☐ Obesity, pre-pregnant BMI greater than or equal to 30 kg/m<sup>2</sup>
- ☐ Smoker (current)

**Postpartum**

- ☐ Anticipated immobility
- ☐ Elective cesarean section
- ☐ Forceps with vaginal trauma
- ☐ PPH greater than 1 litre or blood transfusion
- ☐ Prolonged active labour (greater than 24 hours)
- ☐ Surgical procedure in postpartum

- ☐ Antenatal immobility greater than 7 days
- ☐ Cesarean section in active labour
- ☐ Intravenous drug use
- ☐ Obesity, current BMI greater than 40 kg/m<sup>2</sup>
- ☐ Medical co-morbidities including:
  - Acute medical illness/ sepsis
  - Autoimmune disease/ SLE
  - Cancer
  - Current active systemic infection
  - Heart or lung disease
  - Nephrotic syndrome
  - Pre-eclampsia

- ☐ Previous DVT/ PE
- ☐ Treatment with therapeutic antenatal LMWH
- ☐ Asymptomatic thrombophilia, consult specialist

**0 to 1 Risk Factor**

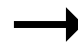

**LOW RISK**

**Equal to or greater  
than 2 Risk Factors**

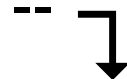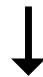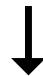

**Any 1 Risk Factor**

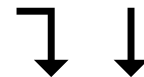

**INTERMEDIATE RISK**

**Any 1 Risk Factor**

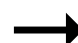

**HIGH RISK**

Key:

BMI = body mass index

DVT = deep vein thrombosis

kg = kilogram

LMWH = low molecular weight heparin

m = metre

PE = pulmonary edema

PPH = postpartum hemorrhage

SLE = Systemic lupus erythematosus
